# Supplementary material
Source: Springer Nature journal article supplement (https://www.springermedizin.de/resource/supplementary/12990_2008_184_MOESM9_ESM.pdf/9612758)

**A****Granuloma**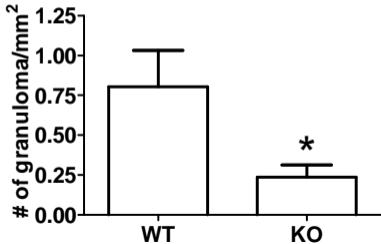**B****Vasculitis**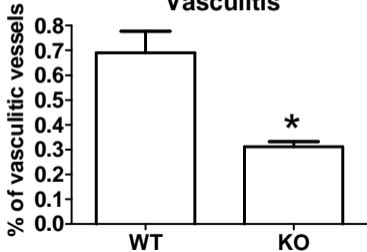

Supplement: MOESM9 [file 9612758]
